# Supplementary material
Source: PubMed Central journal article supplement (PMC2763137)

**Supplemental Figure 4. FGF10 suppresses TGF $\alpha$ -induced morphogenesis and upregulates K6 expression**

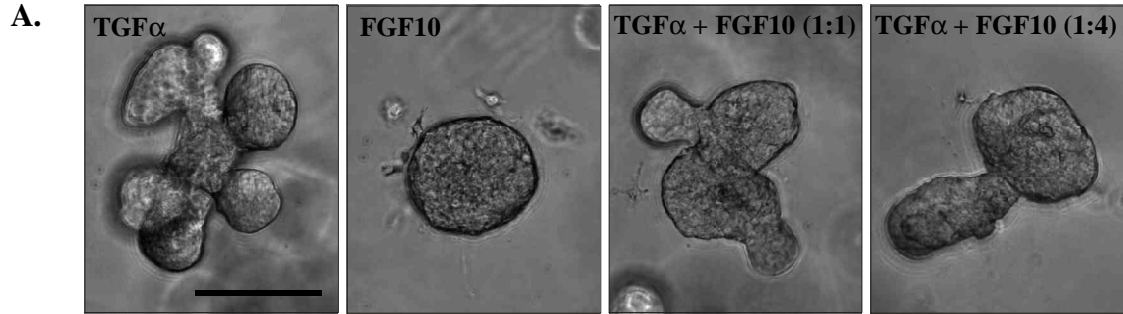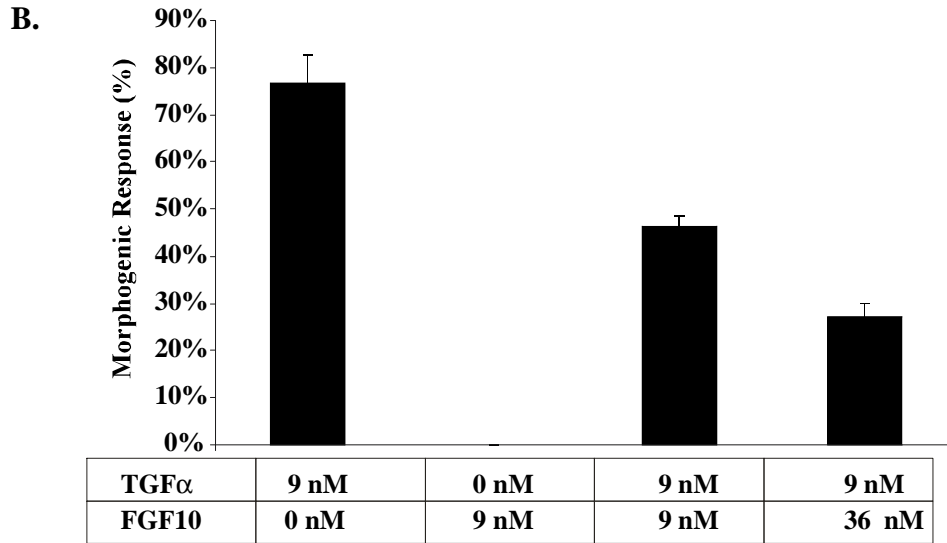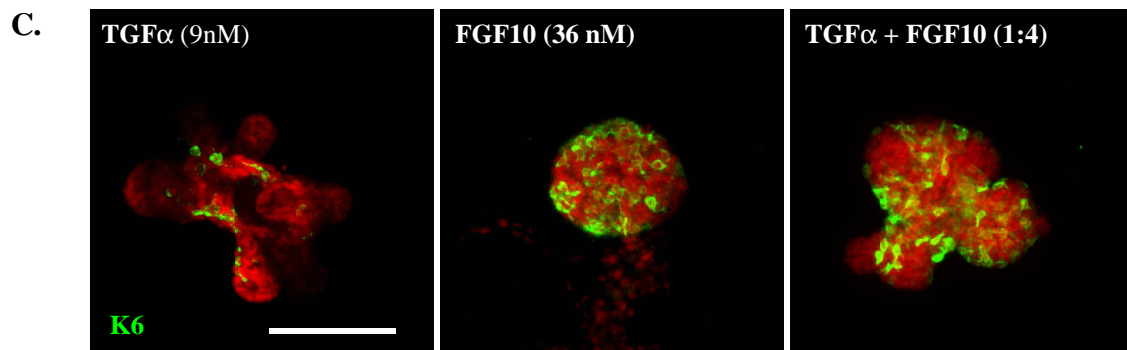

Supplement: NIHMS74395-supplement-supp__data_4.pdf [file NIHMS74395-supplement-supp__data_4.pdf]
