# Supplementary material
Source: PubMed Central journal article supplement (PMC2763137)

SupplementalFigure5.EGFRandFGFR2localization

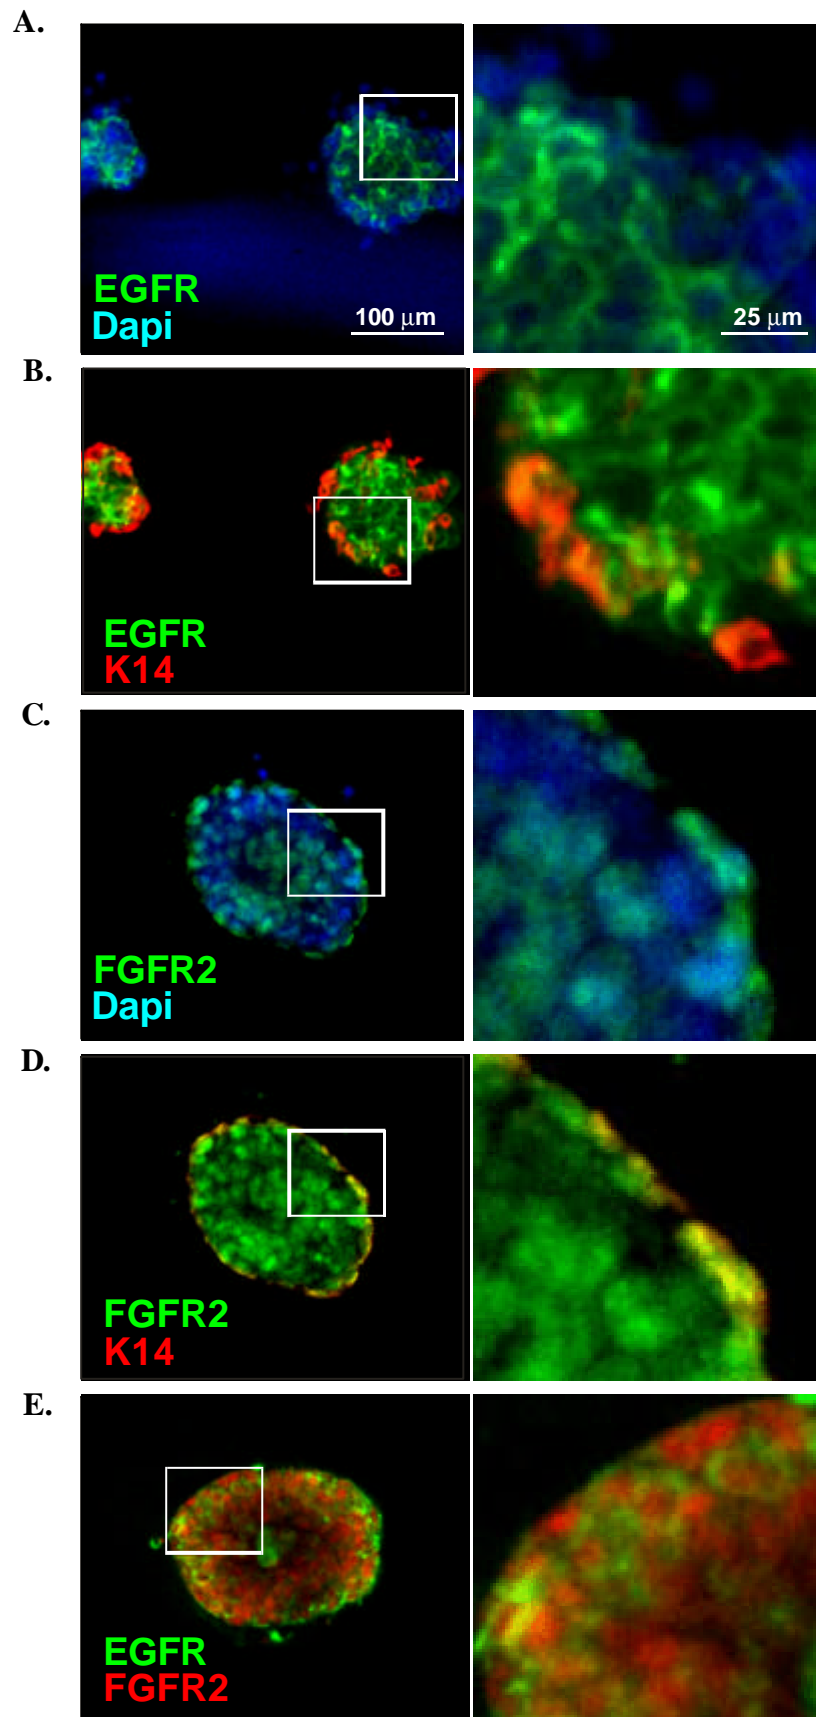

Supplement: NIHMS74395-supplement-supp__data.pdf [file NIHMS74395-supplement-supp__data.pdf]

Supplemental Figure 1. Threshold analysis of K8+K14+ double positive cells.

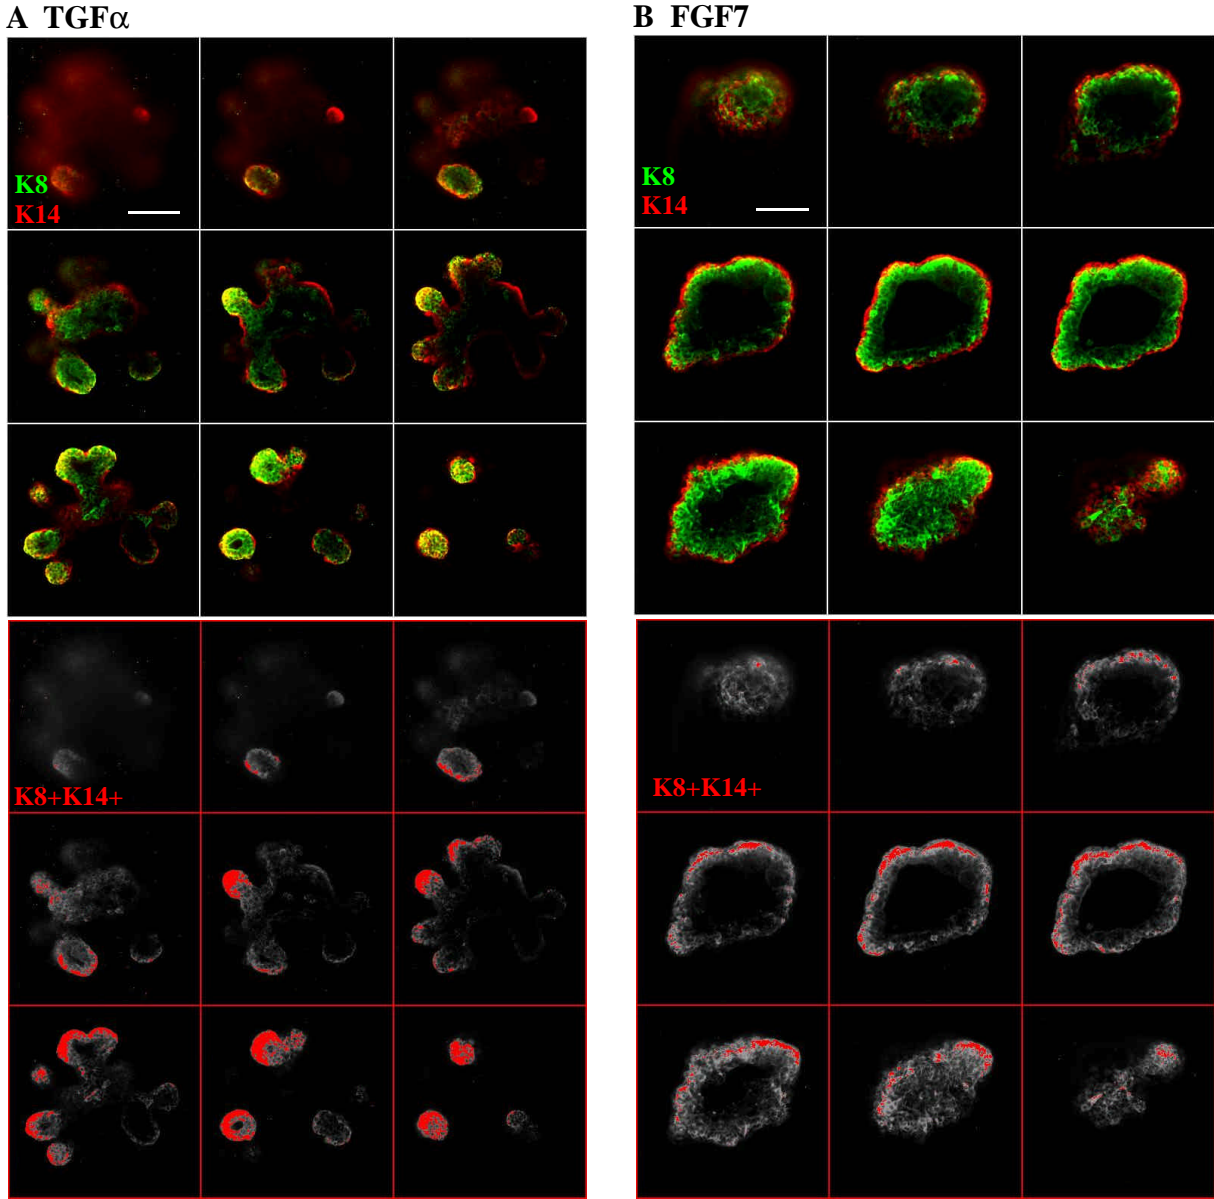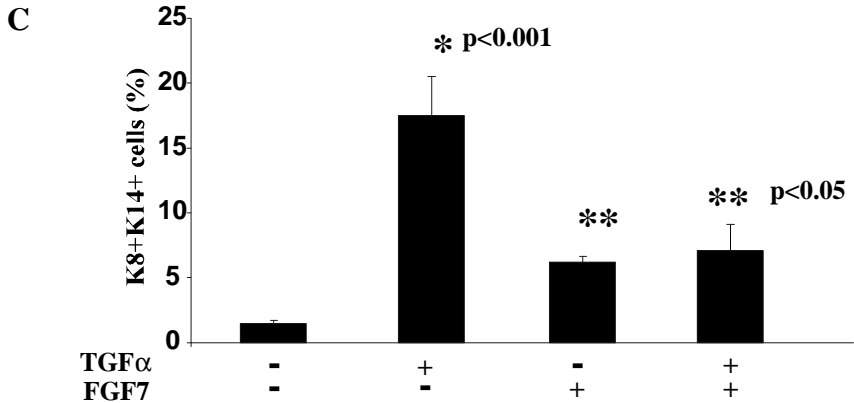

Supplement: NIHMS74395-supplement-supp__data_1.pdf [file NIHMS74395-supplement-supp__data_1.pdf]

Supplemental Figure 2. Threshold analysis of K8+K6+ double positive cells.

A TGF $\alpha$

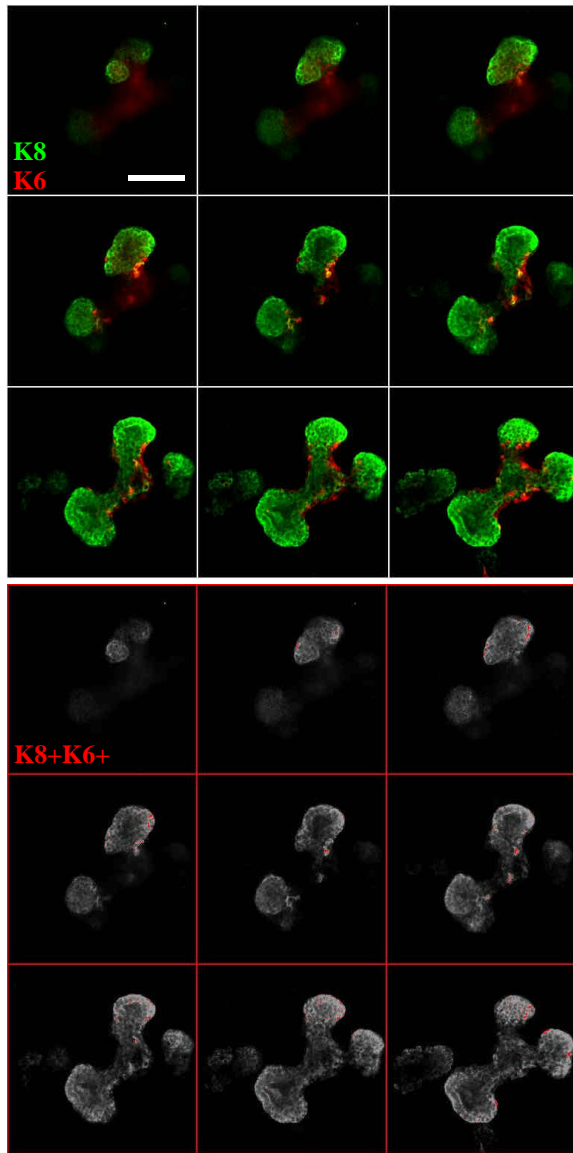

B FGF7

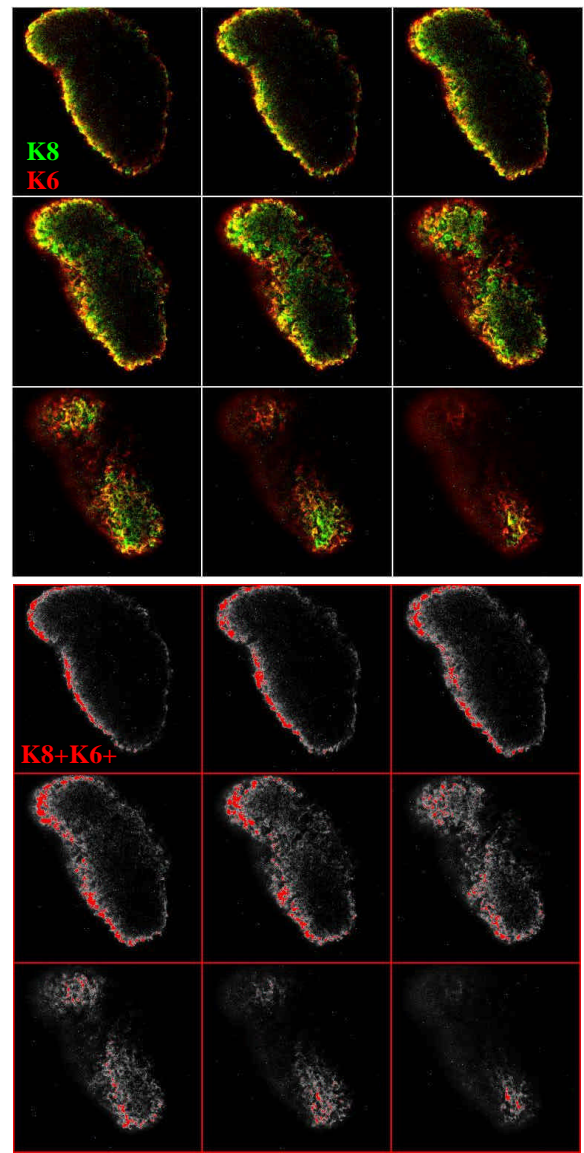

C

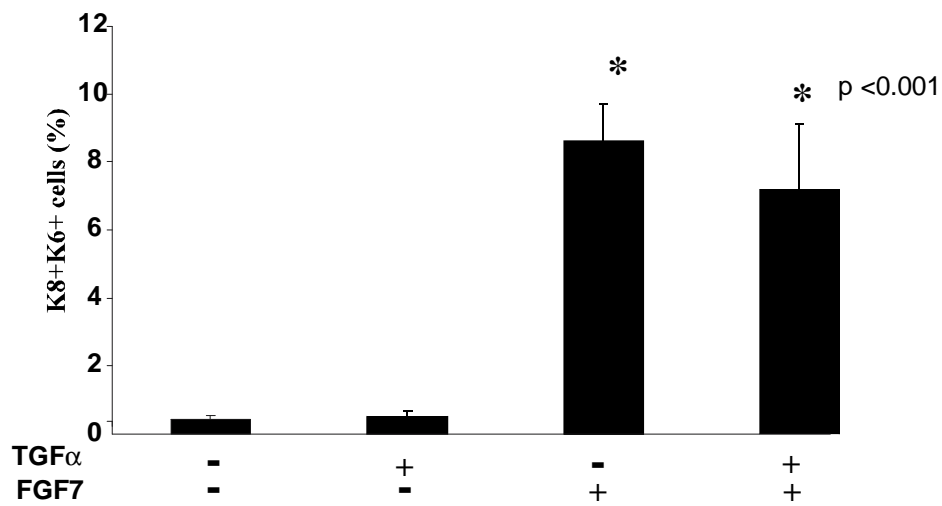

Supplement: NIHMS74395-supplement-supp__data_2.pdf [file NIHMS74395-supplement-supp__data_2.pdf]

Supplemental Figure 3. Localization of K14+K6+ double positive cells

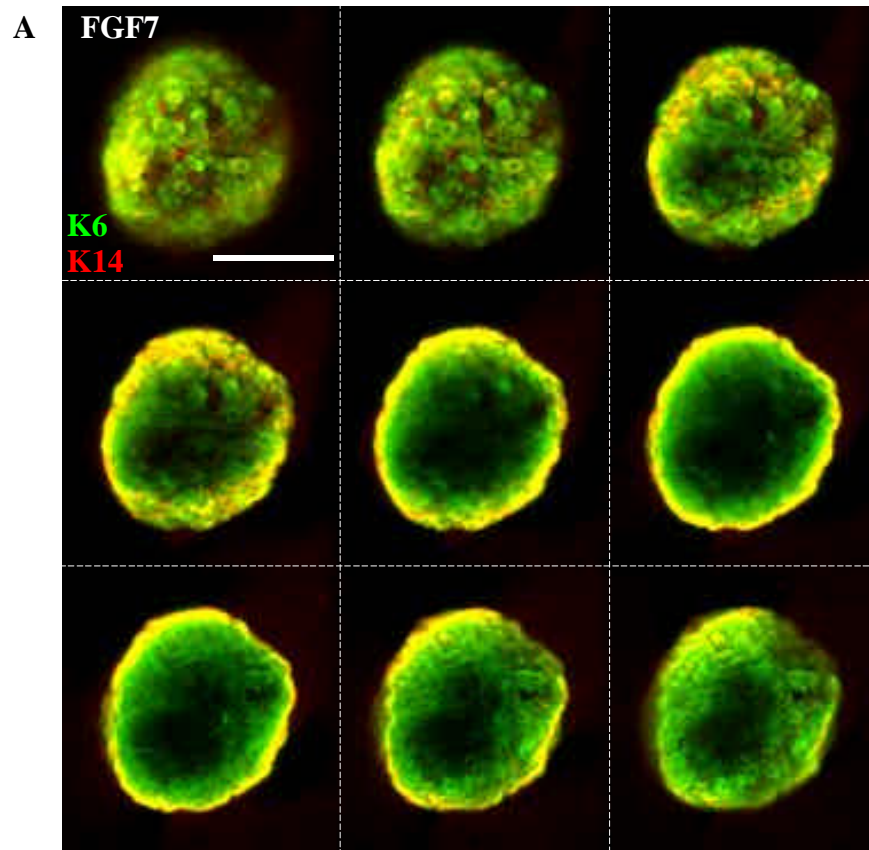

B Higher Magnification

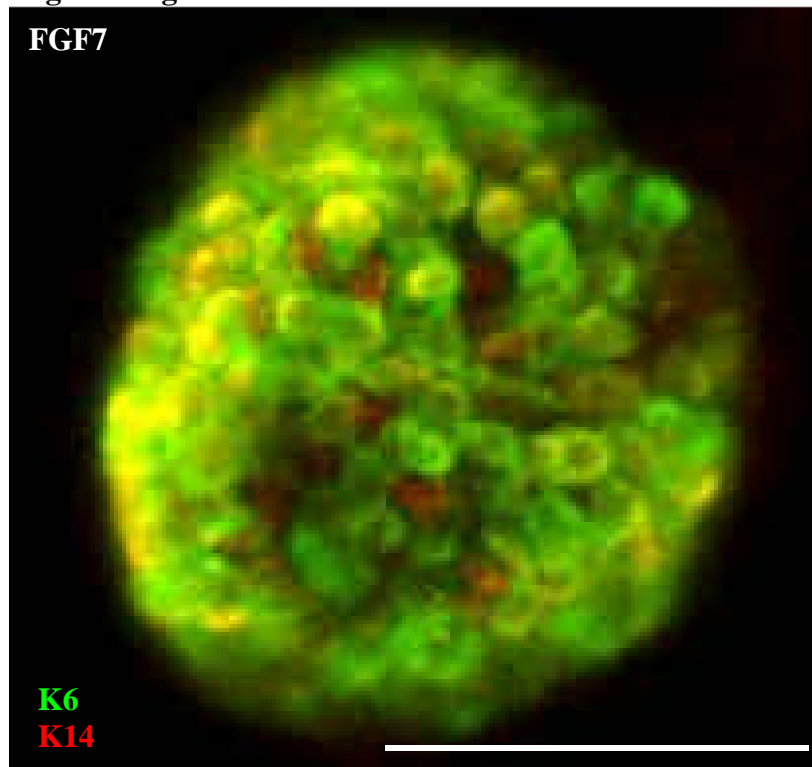

Supplement: NIHMS74395-supplement-supp__data_3.pdf [file NIHMS74395-supplement-supp__data_3.pdf]
